# Supplementary material for: LRG1 Associates with Iron Deficiency Anemia Markers in Adolescents
Source: MDPI journal article supplement (doi:10.3390/nu15143100), 2023-07-11
Supplement: s1 [file s1]

## Supplementary tables

**Supplementary Table 1. Hematological parameters differences based on gender.**

| Characteristic                  | Female, N = 234 <sup>1</sup> | Male, N = 197 <sup>1</sup> | p-value <sup>2</sup> |
|---------------------------------|------------------------------|----------------------------|----------------------|
| RBC (×10 <sup>12</sup> cells/L) | 4.99 (4.73, 5.21)            | 5.10 (4.86, 5.37)          | 0.003                |
| WBC (×10 <sup>9</sup> cells/L)  | 6.70 (5.70, 8.30)            | 6.50 (5.34, 8.10)          | 0.14                 |
| Hb (g/dl)                       | 131 (125, 136)               | 134 (127, 140)             | <0.001               |
| Hct (L/L)                       | 0.403 (0.389, 0.416)         | 0.408 (0.390, 0.422)       | 0.089                |
| Gluc (mmol/L)                   | 4.80 (4.50, 5.30)            | 4.90 (4.40, 5.40)          | 0.8                  |

<sup>1</sup>Median (IQR)

<sup>2</sup>Wilcoxon rank sum test

**Supplementary Table 2. The distribution of anemia subjects based on gender.**

| Characteristic | Female, N = 234 <sup>1</sup> | Male, N = 197 <sup>1</sup> | p-value <sup>2</sup> |
|----------------|------------------------------|----------------------------|----------------------|
|                |                              |                            | 0.3                  |
| Anemic         | 21 (9.0%)                    | 12 (6.1%)                  |                      |
| Not-anemic     | 212 (91%)                    | 185 (94%)                  |                      |

<sup>1</sup>n (%)

<sup>2</sup>Pearson's Chi-squared test

**Supplementary Table 3. Statistical comparison of LRG across tertiles of CRP, Hb and MCV.**

| Characteristic | LRG         | p-value <sup>2</sup> |
|----------------|-------------|----------------------|
| Hb             |             | 0.019                |
| 74.0-128.0     | 30 (25, 40) |                      |
| 128.0-136.0    | 27 (22, 35) |                      |
| 136.0-159.0    | 29 (22, 33) |                      |
| CRP            |             | <0.001               |

| Characteristic | LRG         | p-value <sup>2</sup> |
|----------------|-------------|----------------------|
| 0-0.28         | 27 (21, 33) |                      |
| 0.28-1.54      | 27 (22, 34) |                      |
| 1.54-9.89      | 30 (26, 37) |                      |
| MCV (fL)       |             | 0.5                  |
| 56.4-78.6      | 30 (22, 37) |                      |
| 78.6-83.2      | 30 (24, 36) |                      |
| 83.2-106.5     | 28 (22, 36) |                      |

<sup>1</sup>Median (IQR)

<sup>2</sup>Kruskal-Wallis rank sum test

**Supplementary Table 4. Comparison of various clinical characteristics based on anemia status.**

| Characteristic                  | Anemic, N = 33 <sup>1</sup> | Not-anemic, N = 397 <sup>1</sup> | p-value <sup>2</sup> |
|---------------------------------|-----------------------------|----------------------------------|----------------------|
| Gluc (mmol/L)                   | 5.00 (4.70, 5.40)           | 4.80 (4.40, 5.30)                | 0.14                 |
| Albumin g/liter                 | 40.10 (38.50, 41.80)        | 41.60 (40.00, 42.83)             | 0.002                |
| Iron (µg/dL)                    | 9.0 (6.0, 13.0)             | 13.0 (9.0, 17.0)                 | 0.002                |
| Transferrin saturation (in %)   | 13 (7, 20)                  | 17 (13, 24)                      | 0.010                |
| Ferritin (µg/L)                 | 13 (6, 33)                  | 21 (15, 31)                      | 0.021                |
| WBC (×10 <sup>9</sup> cells/L)  | 6.70 (5.70, 7.70)           | 6.68 (5.50, 8.20)                | 0.8                  |
| RBC (×10 <sup>12</sup> cells/L) | 4.88 (4.52, 5.52)           | 5.02 (4.81, 5.25)                | 0.6                  |
| Hb (g/dl)                       | 113 (107, 117)              | 133 (128, 139)                   | <0.001               |
| Hct (L/L)                       | 0.363 (0.347, 0.370)        | 0.407 (0.394, 0.420)             | <0.001               |
| MCV                             | 71 (65, 79)                 | 81 (78, 85)                      | <0.001               |
| RDW (fL)                        | 15.70 (13.90, 17.20)        | 13.50 (12.90, 14.20)             | <0.001               |
| CRP                             | 0.29 (0.12, 2.54)           | 0.65 (0.17, 2.10)                | 0.5                  |
| LRG ug/mL                       | 31 (25, 42)                 | 29 (23, 35)                      | 0.07                 |

| Characteristic | Anemic, N = 33 <sup>1</sup> | Not-anemic, N = 397 <sup>1</sup> | p-value <sup>2</sup> |
|----------------|-----------------------------|----------------------------------|----------------------|
|----------------|-----------------------------|----------------------------------|----------------------|

<sup>1</sup>Median (IQR); n (%)

<sup>2</sup>Wilcoxon rank sum test; Pearson's Chi-squared test; Fisher's exact test
